# Supplementary material
Source: PubMed Central journal article supplement (PMC7338333)
Supplement: 12250_2020_227_MOESM1_ESM.pdf [file 12250_2020_227_MOESM1_ESM.pdf]

## Electronic Supplementary Material

### Clinical Manifestation and Laboratory Characteristics of SARS-CoV-2 Infection in Pregnant Women

Chunchen Wu<sup>1</sup> • Wenzhong Yang<sup>2</sup> • Xiaoxue Wu<sup>1</sup> • Tianzhu Zhang<sup>1</sup> • Yaoyao Zhao<sup>1</sup> • Wei Ren<sup>3</sup> • Jianbo Xia<sup>1</sup>✉

1. Department of Laboratory Medicine, Maternal and Child Health Hospital of Hubei Province, Wuhan 430070, China;
2. Department of Radiology, Maternal and Child Health Hospital of Hubei Province, Wuhan 430070, China;
3. Department of Obstetrics, Maternal and Child Health Hospital of Hubei Province, Wuhan 430070, China

Supporting information to DOI: 10.1007/s12250-020-00227-0

**Table S1.** Laboratory characteristics of pregnant women

| Patient No.    | SARS-CoV-2 infection |        |       |        |       |        |        |       |        | General |       |       |       |       |        |       |
|----------------|----------------------|--------|-------|--------|-------|--------|--------|-------|--------|---------|-------|-------|-------|-------|--------|-------|
|                | 1                    | 2      | 3     | 4      | 5     | 6      | 7      | 8     | Mean   | 1       | 2     | 3     | 4     | 5     | Mean   |       |
| Ages           | 28                   | 31     | 30    | 30     | 30    | 26     | 29     | 35    | 30     | 33      | 33    | 25    | 29    | 30    | 30     |       |
| CRP (mg/L)     | Pre-                 | 1.93   | 0.93  | 8.37   | 3.12  | 4.54   | 8.37   | 7.50  | 0.50   | 4.41    | 3.00  | 3.92  | 3.98  | 6.94  | 5.67   | 4.70  |
|                | Post-                | 245.44 | 89.47 | 73.18  | 49.06 | 23.25  | 44.28  | 18.46 | 92.87  | 79.50   | 30.07 | 34.86 | 41.01 | 46.31 | 61.45  | 42.74 |
| CK (U/L)       | Pre-                 | 54.62  | 32.00 | 40.19  | 93.18 | 43.58  | 35.00  | 45.01 | NA     | 49.08   | 43.38 | 47.24 | 80.66 | 26.25 | 137.29 | 66.96 |
|                | Post-                | 28.00  | NA    | 105.00 | NA    | 298.00 | 118.18 | 21.00 | 102.73 | 112.15  | NA    | NA    | NA    | NA    | NA     | NA    |
| CK-MB (U/L)    | Pre-                 | 13.86  | 13.5  | 19.66  | 11.48 | 14.15  | 14.30  | 7.27  | NA     | 13.46   | 9.94  | 10.91 | 16.02 | 12.10 | 16.37  | 13.07 |
|                | Post-                | 10.04  | NA    | 28.00  | NA    | 97.00  | 53.58  | 9.40  | 125.41 | 53.905  | NA    | NA    | NA    | NA    | NA     | NA    |
| D-dimer(mg/mL) | Pre-                 | 1.94   | 0.93  | 0.22   | 6.48  | 2.00   | 2.16   | 0.99  | 1.05   | 1.97    | 1.33  | 1.46  | 1.37  | 2.38  | 1.92   | 1.69  |
|                | Post-                | 1.47   | 2.32  | 0.21   | 4.72  | 10.36  | 6.17   | 0.54  | 13.20  | 4.87    | 1.92  | 1.22  | 1.97  | 0.76  | 3.29   | 1.83  |

**Note:** Eight pregnant cases, including six laboratory-confirmed severe acute respiratory syndrome coronavirus 2 (SARS-CoV-2) infection and two highly suspected SARS-CoV-2 infections, and five pregnant cases excluding SARS-CoV-2 infection are analyzed.

**Abbreviations:** NA, not available; CRP, C-reactive protein; CK, creatine kinase; CK-MB, creatine kinase-MB; pre -, pre-partum; post -, postpartum.
